# Supplementary material
Source: Springer Nature journal article supplement (https://www.springermedizin.de/resource/supplementary/12895_2013_162_MOESM1_ESM.pdf/9514276)
Supplement: MOESM1 [file 9514276]

Suplimentary Figure 1.

MiRVec-map.

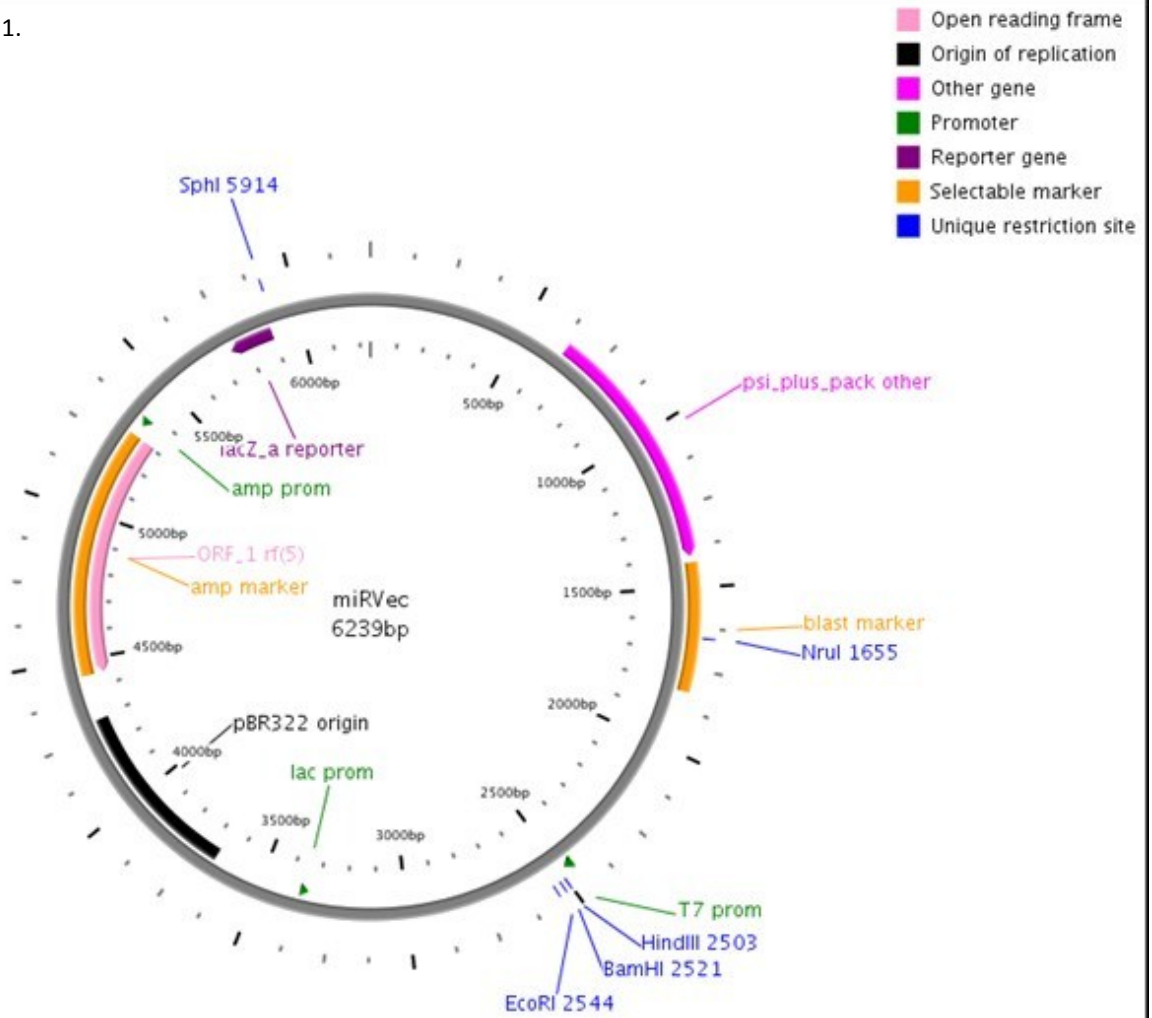

Suplimentary Figure 2.

Insert consensus sequence:

```
TCGTATGTGTATGTGCGTGATTGTATATGCGCCCCAGATACTGCGTATG
TGTGTATATATGTATTAGGCTTAAACGGAATCTCAATTTTGTGAAGGAAA
GGAGCTTAGAGAAGAAATACCATAACCACTGTTTGTTCATCTTAGTTAT
GAACCTCGAACAGAAATTGCCTGTCATTCTTGTTCCTTGCTTTGTCT
CAAGAAAAGAAAACATTGTTGCGCTCCTCTCAGTCCCTGAGACCCTAACTT
GTGATGTTTACCGTTTAAATCCACGGGTTAGGCTCTTGGGAGCTGCGAGT
CGTGCTTTTGCATCCTGGAAATTTGGTGAATTTTATTCTTTAAAGCAA
AACAAAAGAAAAGAAAGTTTGTCTGAGGTGATTGAGTATACCTCTGAGGT
TTTCATTGTTAGATGGGATCAGGTGACCAGAGAGTGGCAGCTCTGGATT
TCTGTTAAAGTAGGTATATATTTTGTCTTAATAGCGTGTGGCTGCTATG
TGTATG
```
